# Supplementary material for: Production of methyl levulinate from cellulose: selectivity and mechanism study
Source: Royal Society of Chemistry journal article supplement (doi:10.1039/c5gc00440c), 2015-01-01
Supplement: c5gc00440c1.pdf [file c5gc00440c1.pdf]

## Production of methyl levulinate from cellulose: the selectivity and mechanism study

Daqian Ding, Jinxu Xi, Jianjian Wang, Xiaohui Liu,\* Guanzhong Lu and Yanqin Wang

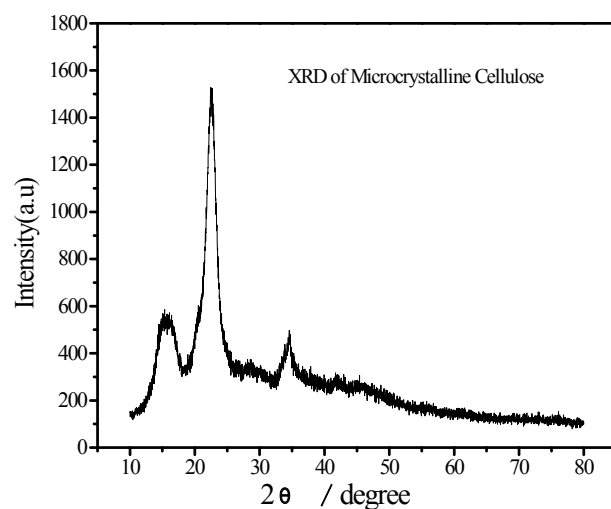

Figure S1 XRD pattern of the microcrystalline cellulose (untreated and directly used in reaction).

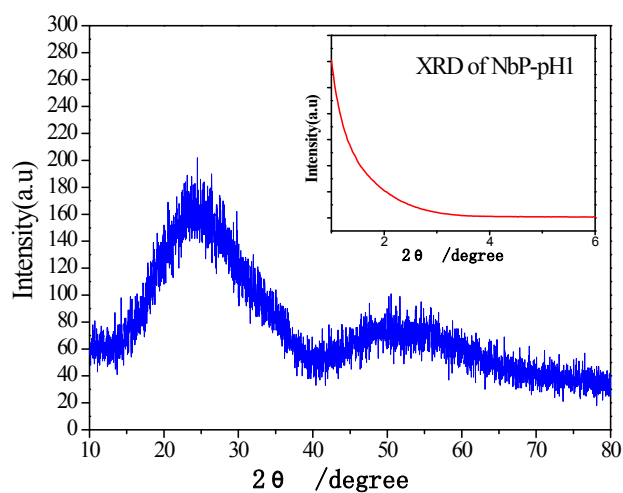

Figure S2 XRD on amorphous NbP-pH1 catalyst.

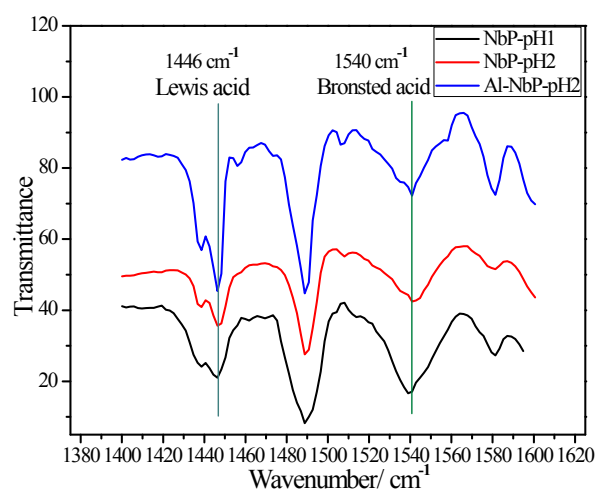

Figure S3 The Py-FTIR spectrum of solid acids used in cellulose alcoholysis, scanned at 373K.

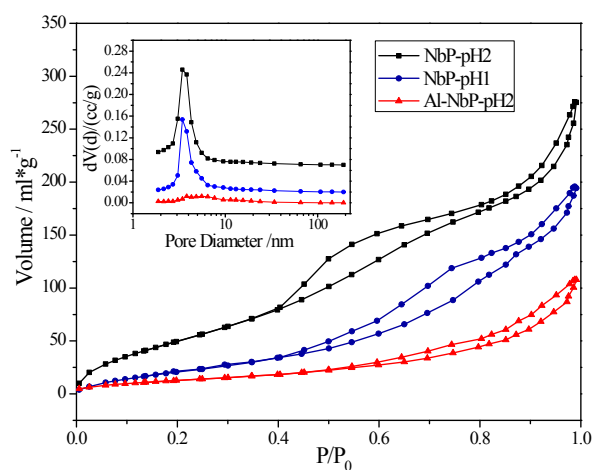

Figure S4  $\text{N}_2$  adsorption-desorption isotherms and pore size distributions of three solid acids used in cellulose alcoholysis, measured at  $-196^\circ\text{C}$ .

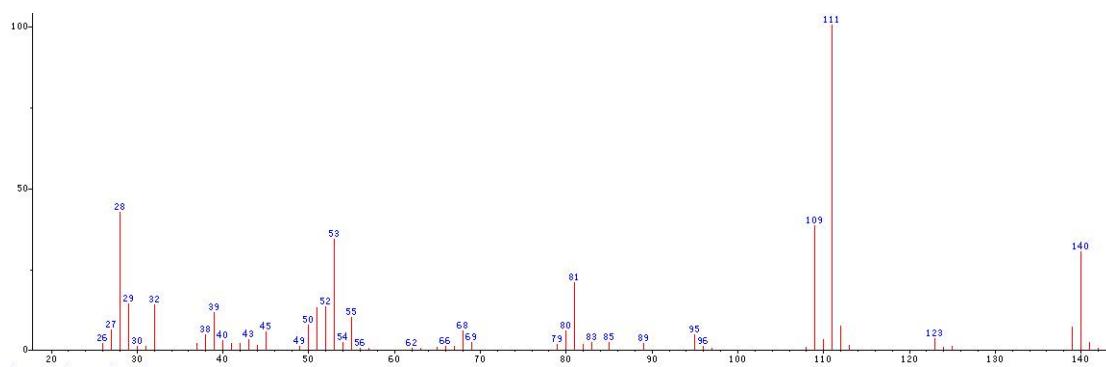

Figure S5 MS spectrum of 5-MMF analyzed by GC-MS.

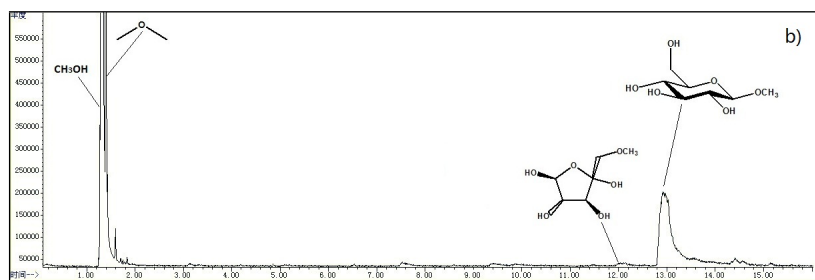

Figure S6 GC-MS spectra of reaction solution catalyzed by a) NbP-pH1 and b) NbP-pH2, reacted at 180 °C for short time (2h).

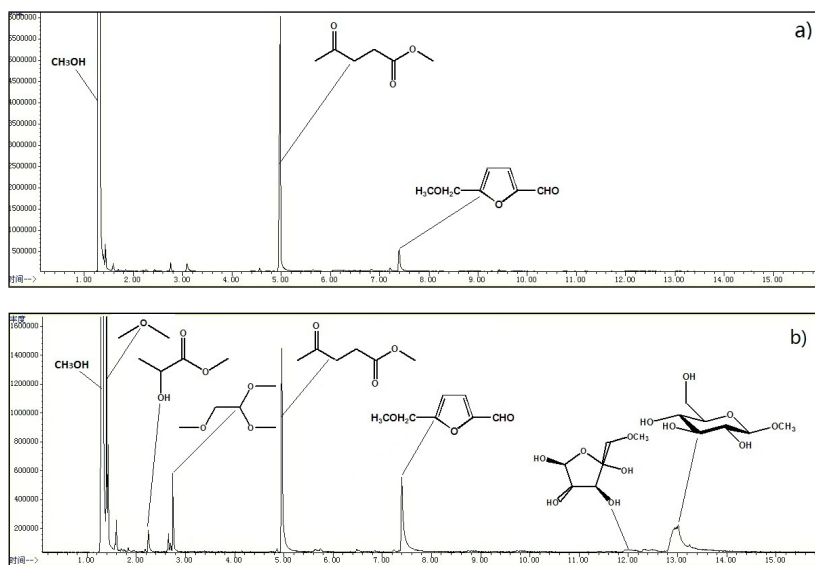

Figure S7 GC-MS spectra of reaction solution catalyzed by a) NbP-pH1 and b) NbP-pH2 reacted at 180 °C for 8h.

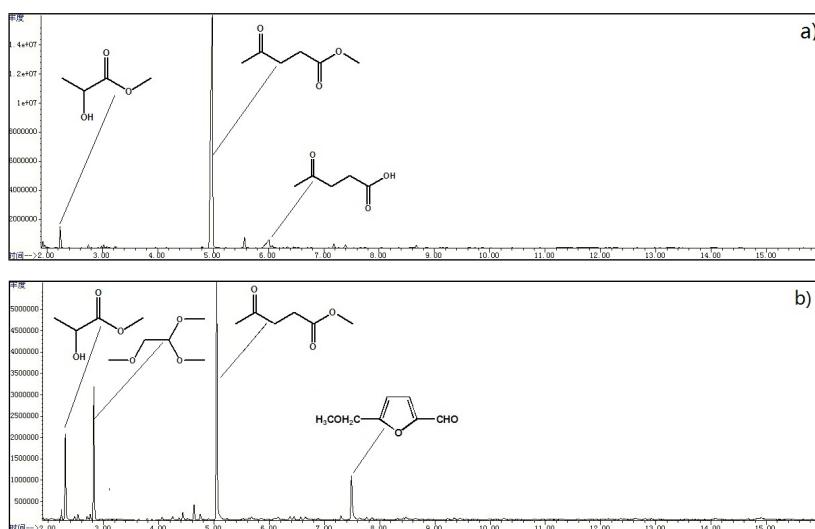

Figure S8 GC-MS spectra of reaction solution catalyzed by a) NbP-pH1 and b) NbP-pH2, reacted at 180 °C for 24h.
